# Supplementary material for: PBRM1 acts as a p53 lysine-acetylation reader to suppress renal tumor growth
Source: PubMed Central journal article supplement (PMC6925188; doi:10.1038/s41467-019-13608-1), 2019-12-20
Supplement: 41467_2019_13608_MOESM1_ESM.pdf [file 41467_2019_13608_MOESM1_ESM.pdf]

**PBRM1 acts as a p53 lysine-acetylation reader to suppress renal tumor growth**

**Cai et al.**

## Supplementary figures:

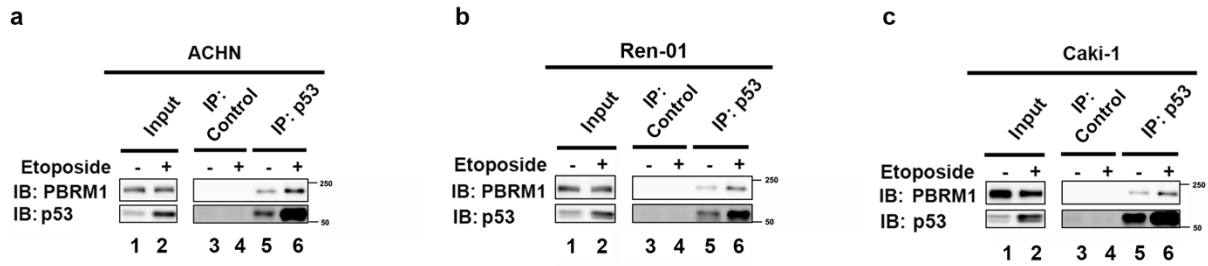

### Supplementary Figure 1. Endogenous PBRM1 and p53 physically associate in kidney cancer cells.

ACHN (a), Ren-01 (b) and Caki-1 (c) cells were treated with vehicle (DMSO) or etoposide (50 μM) for 8 h and harvested for immunoprecipitation with control IgG and p53 antibodies. The bound PBRM1 and p53 were examined by immunoblots. Source data are provided as a Source Data file.

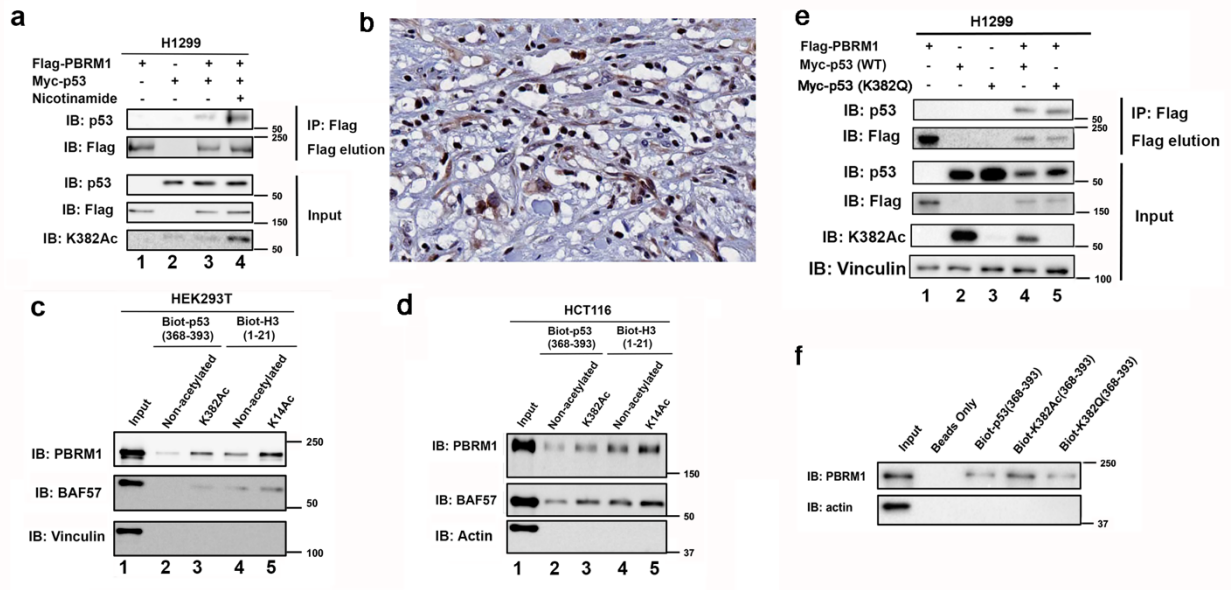

**Supplementary Figure 2. Acetylation on K382 enhances p53's interaction with PBRM1 and it naturally occurs in renal tumors.**

**a.** Vectors, Flag-PBRM1 or Myc-p53 were transfected into H1299 cells as indicated, and treated with 5  $\mu$ M nicotinamide or vehicle. Lysates were used for anti-Flag immunoprecipitation and 3X Flag peptide elution. The inputs and eluates were immunoblotted with the indicated antibodies.

**b.** A representative picture of immunohistochemical analysis of human ccRCC tumors with anti-K382Ac antibody.

**c, d.** Biotinylated p53 peptides with lysine acetylation at the indicated sites were incubated with lysates from HEK293T cells (**c**) or HCT116 cells (**d**). The peptides were pulled down with streptavidin beads and the associated proteins were analyzed by immunoblots.

**e.** Flag-PBRM1, wildtype or K382Q mutated Myc-p53 were transfected into H1299 cells with indicated combinations. Lysates were used for anti-Flag immunoprecipitation followed by Flag peptide elution. The inputs and eluates were immunoblotted with the indicated antibodies.

**f.** H1299 cell lysates were incubated with indicated biotinylated p53 peptides. The peptides were pulled down with streptavidin beads and the associated protein was immunoblotted with indicated antibodies. Source data are provided as a Source Data file.

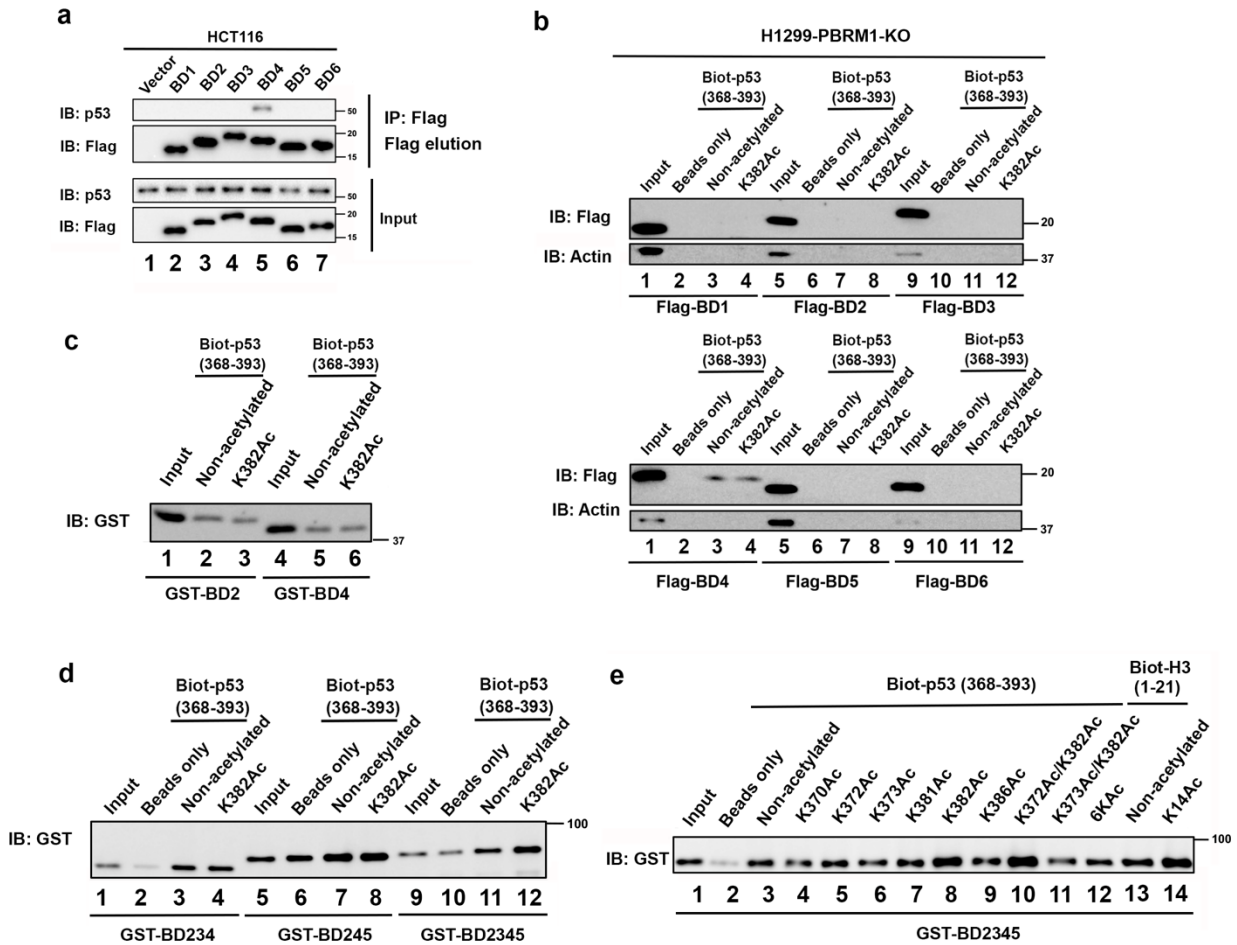

### Supplementary Figure 3. Bromodomain 4 of PBRM1 is critical for binding p53.

**a.** HCT116 cells were transfected with vector or individual Flag-PBRM1 bromodomains and treated with 50  $\mu$ M etoposide for 8 h. Lysates were subjected to immunoprecipitation with Flag-M2 beads. The inputs and eluates were analyzed by immunoblots. **b.** H1299 PBRM1 KO cells were transfected with the individual Flag-PBRM1 bromodomains as indicated. Lysates were incubated with biotinylated p53 peptides with lysine acetylation at the indicated sites. The peptides were pulled down with streptavidin beads and the associated proteins were immunoblotted with the indicated antibodies. **c, d, e.** Purified GST-PBRM1 BD2 and BD4 (**c**), bromodomain combinations (**d**) or BD2345 (**e**) were incubated with biotinylated p53 peptides with lysine acetylation at the indicated sites. The peptides were pulled down with streptavidin

beads and the associated proteins were immunoblotted with anti-GST antibody. Source data are provided as a Source Data file.

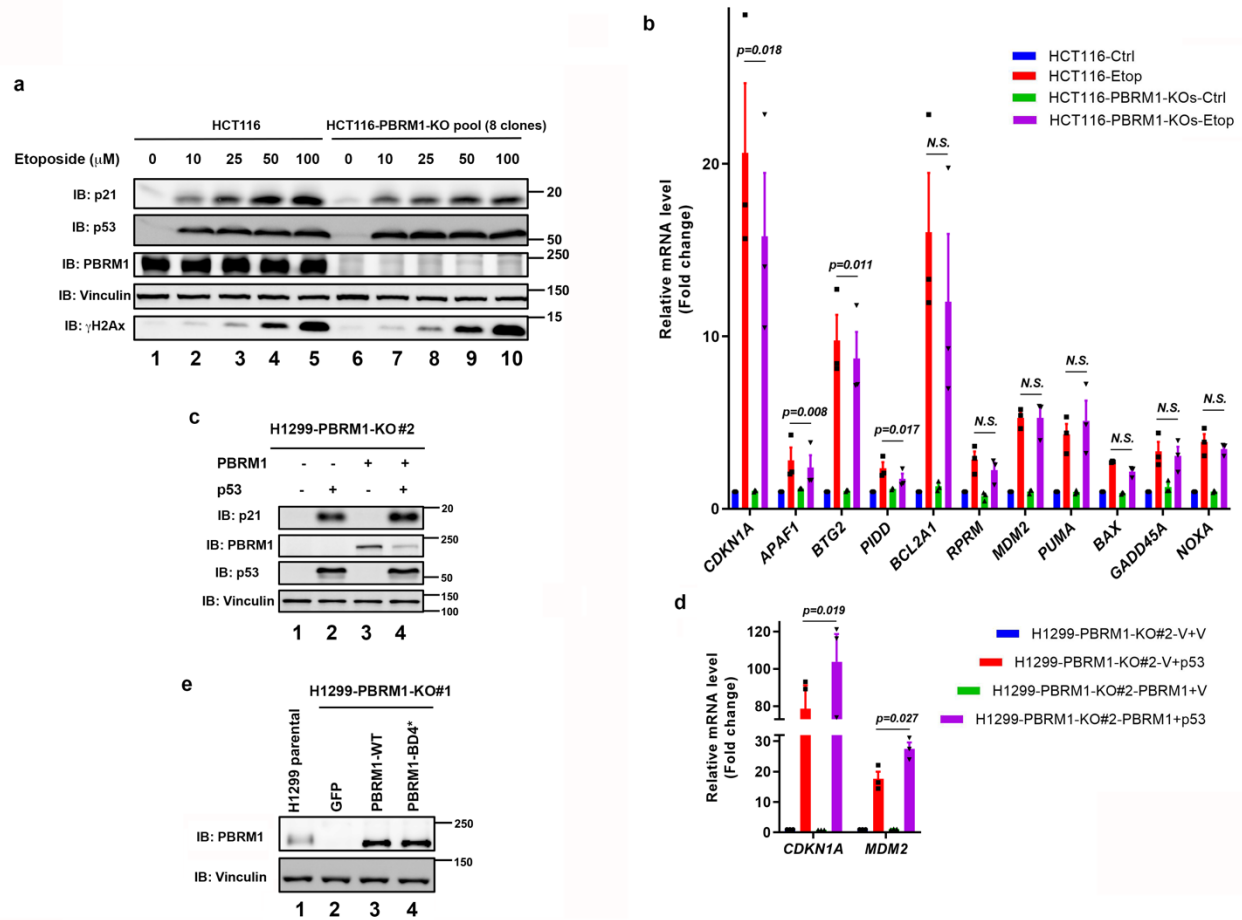

### Supplementary Figure 4. PBRM1 is required for full p53 transcriptional activity.

**a, b.** HCT116 parental and PBRM1 KO cells (combination of eight clones) were treated with vehicle or etoposide at the indicated doses for 24 h, and lysates were analyzed by immunoblots (**a**). RNA was extracted and reverse transcribed from the indicated cells treated with 50  $\mu$ M etoposide. Gene expression was measured by qPCR (**b**), and data are shown as mean  $\pm$  SEM. p-values were calculated using the paired two-tailed Student's t-test. **c, d.** Vectors, Flag-PBRM1 and Myc-p53 were transfected into H1299 PBRM1-KO#2. Cells were harvested for immunoblot analysis (**c**) and RT-qPCR (**d**). N= 3 biologically independent samples. **e.** GFP, wild-type or BD4\* mutant PBRM1 were stably expressed in H1299 PBRM1-KO#1. Lysates were analyzed via immunoblot to examine PBRM1 expression. Source data are provided as a Source Data file.

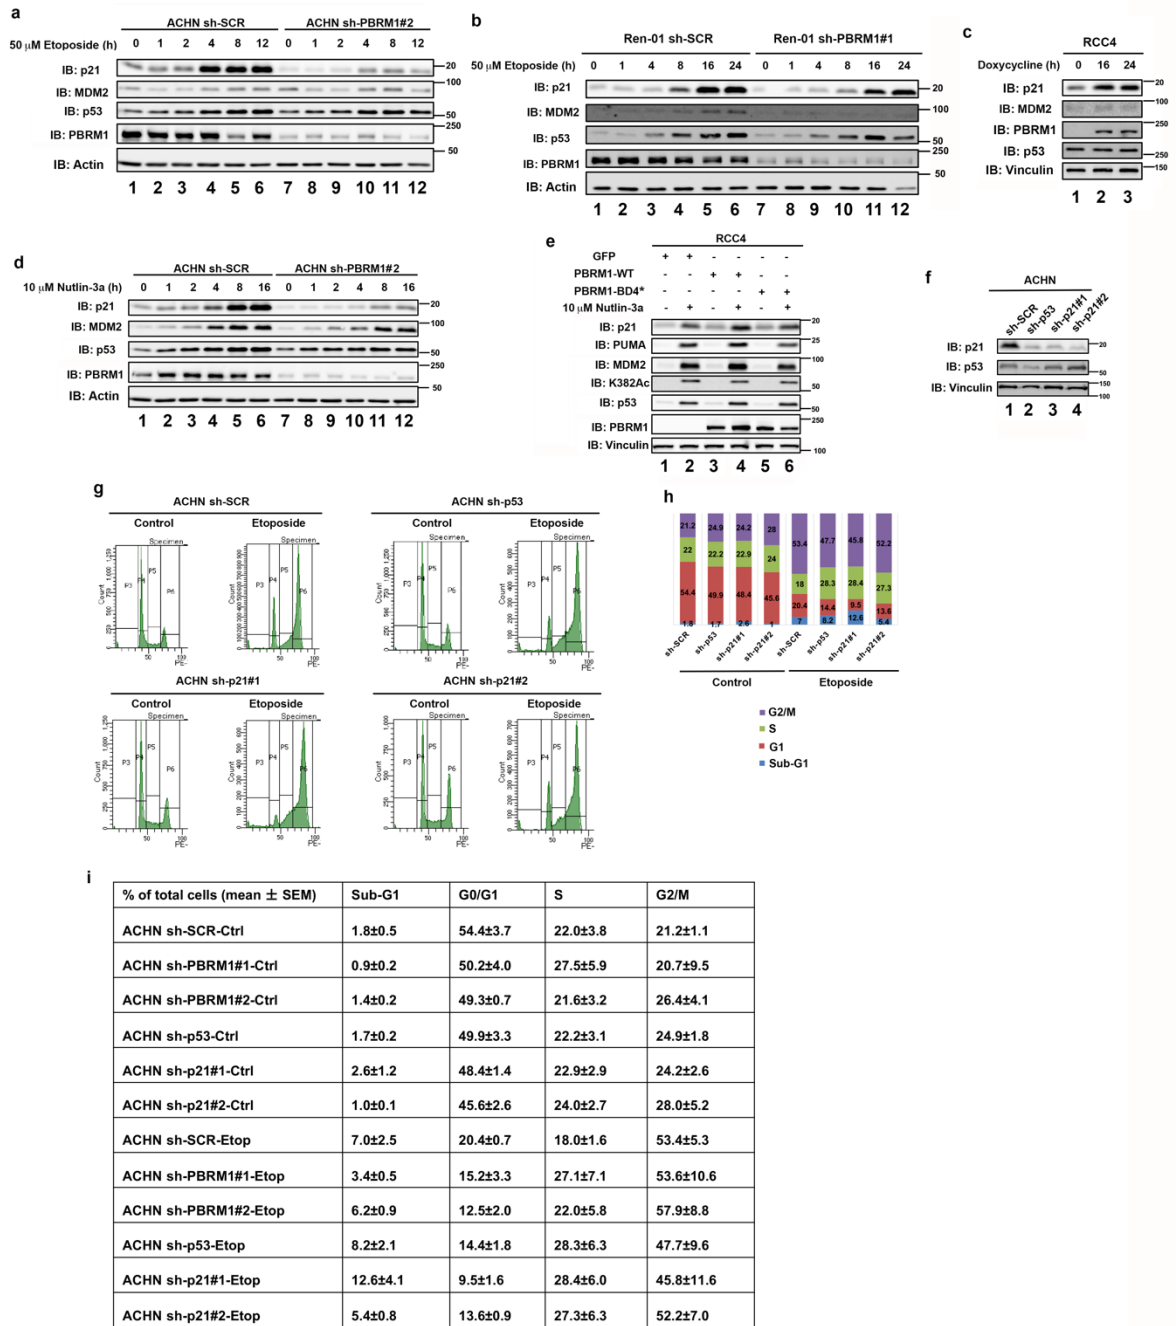

**Supplementary Figure 5. PBRM1 is critical for the p53 signaling pathway and its biological function in ccRCC cells.**

**a.** ACHN control and PBRM1 shRNA #2 knockdown cells were treated with 50  $\mu$ M etoposide for the indicated times. Lysates were analyzed via immunoblots. **b.** Ren-01 control and PBRM1 shRNA #1 knockdown cells were treated with 50  $\mu$ M etoposide for the indicated times. Lysates were analyzed by immunoblots. **c.** RCC4 cells containing inducible PBRM1 were treated with doxycycline for the indicated times, and lysates were immunoblotted. **d.** ACHN control and PBRM1 shRNA #2 knockdown cells were treated with 10  $\mu$ M Nutlin-3a for the indicated times. Lysates were analyzed via immunoblots. **e.** RCC4 cells stably expressing GFP, wild-type or BD4\* mutant PBRM1 were treated with 10  $\mu$ M Nutlin-3a. Lysates were analyzed via immunoblots. **f, g, h.** ACHN control, p53 and p21 shRNA knockdown cells were harvested for immunoblots (**f**) or treated with vehicle or 50  $\mu$ M etoposide for cell cycle analysis. Representative data is shown in **g**. Quantification of cell cycle phase is shown in **h** and **i** as mean  $\pm$  SEM. N= 3 biologically independent samples. Source data are provided as a Source Data file.



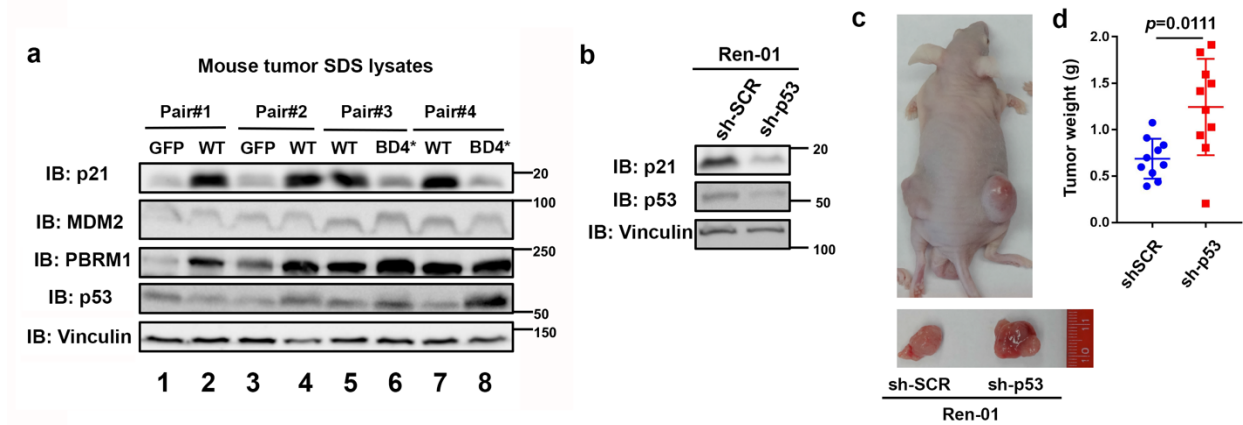

**Supplementary Figure 6. Suppression of p53 promotes tumor growth in Ren-01 cells.**

**a.** Protein was harvested from tumors formed by Ren-01 PBRM1 KO cells expressing GFP, wild type PBRM1 (WT) or BD4\* mutant PBRM1 (AA) in nude mice. Lysates were analyzed by immunoblots. **b, c, d.** Ren-01 control and p53 shRNA knockdown cells were harvested for immunoblots (**b**) and used in nude mice xenograft experiments. Tumors were excised and weighed, and data are shown as mean  $\pm$  SEM (**d**). p-values were calculated using the paired two-tailed Student's t-test. N= 10 biologically independent mice. Representative photographs of nude mouse (**c**, top) and tumors (**c**, bottom). Source data are provided as a Source Data file.

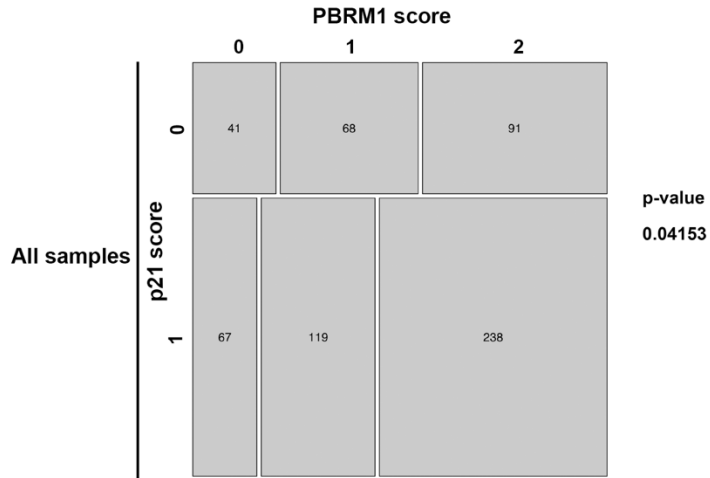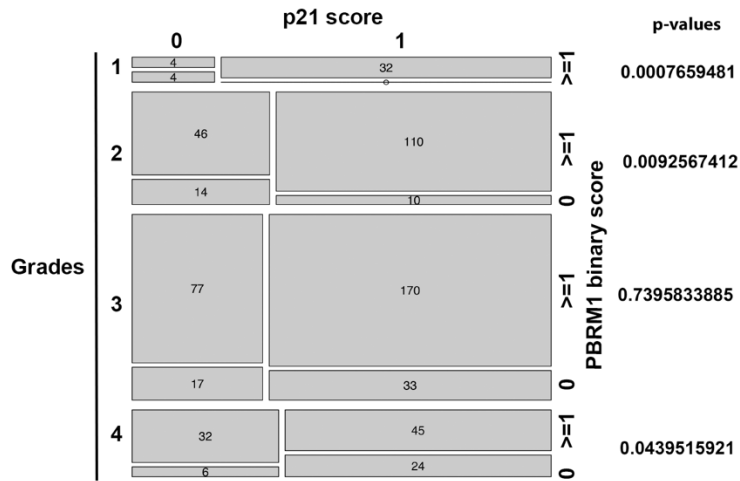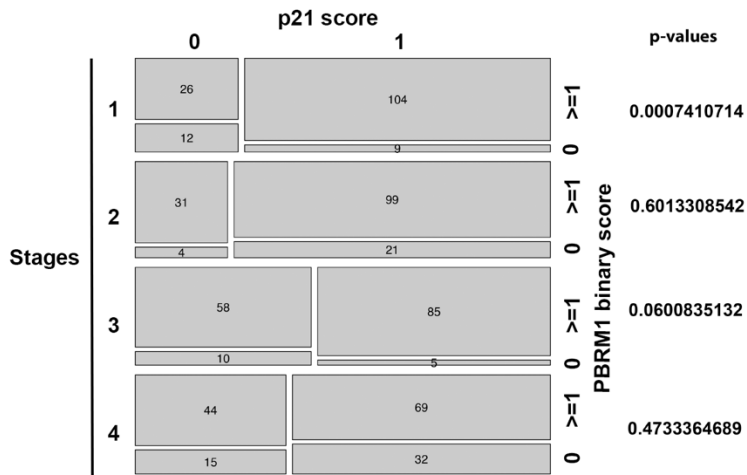

**Supplementary Figure 7. PBRM1 loss and p21 loss correlate in human ccRCC tumors.**

Analysis of the correlations between PBRM1 loss and p21 loss by Fisher's Exact tests in all samples (**top**), all grades (**middle**) and all stages (**bottom**).

| Position | Symbol | Fold Change (comparing to H1299-V) | Comments | Fold Change | Comments | Fold Change | Comments |
|----------|--------|------------------------------------|----------|-------------|----------|-------------|----------|
|          |        | H1299-p53                          |          |             |          |             |          |
| A01      | APAF1  | 7.6683                             | OKAY     | 1.5862      | OKAY     | 4.7453      | OKAY     |
| A02      | ATM    | 1.3745                             | OKAY     | 1.2974      | OKAY     | 1.2197      | OKAY     |
| A03      | ATR    | 0.9006                             | OKAY     | 1.1216      | OKAY     | 0.8625      | OKAY     |
| A04      | BAI1   | 4.2249                             | A        | 1.1531      | B        | 2.2138      | B        |
| A05      | BAX    | 3.6023                             | OKAY     | 1.4903      | OKAY     | 3.7751      | OKAY     |
| A06      | BBC3   | 17.7396                            | A        | 11.8398     | A        | 12.6102     | A        |
| A07      | BCL2   | 0.8699                             | B        | 0.6716      | B        | 0.6141      | B        |
| A08      | BCL2A1 | 9.7737                             | B        | 1.1938      | B        | 4.1598      | B        |
| A09      | BID    | 2.7874                             | OKAY     | 1.7846      | OKAY     | 2.3892      | OKAY     |
| A10      | BIRC5  | 0.4115                             | OKAY     | 1.2532      | OKAY     | 0.6627      | OKAY     |
| A11      | BRCA1  | 0.4927                             | OKAY     | 1.2884      | OKAY     | 0.6814      | OKAY     |
| A12      | BRCA2  | 0.5137                             | OKAY     | 1.3524      | OKAY     | 0.5891      | OKAY     |
| B01      | BTG2   | 124.4053                           | A        | 1.8475      | B        | 54.4369     | A        |
| B02      | CASP2  | 0.5355                             | OKAY     | 0.7768      | OKAY     | 0.5534      | OKAY     |
| B03      | CASP9  | 1.1801                             | OKAY     | 1.6421      | OKAY     | 1.4505      | OKAY     |
| B04      | CCNB1  | 0.5066                             | OKAY     | 1.1531      | OKAY     | 0.7054      | OKAY     |
| B05      | CCNE1  | 1.3004                             | OKAY     | 0.5232      | OKAY     | 1.0766      | OKAY     |
| B06      | CCNG1  | 1.9574                             | OKAY     | 1.1294      | OKAY     | 1.713       | OKAY     |
| B07      | CCNH   | 0.8579                             | OKAY     | 1.0538      | OKAY     | 0.9308      | OKAY     |
| B08      | CDC25A | 0.5942                             | OKAY     | 0.7986      | OKAY     | 0.4312      | OKAY     |
| B09      | CDC25C | 0.3839                             | OKAY     | 1.6083      | OKAY     | 1.0618      | OKAY     |
| B10      | CDK1   | 0.4201                             | OKAY     | 1.025       | OKAY     | 0.6582      | OKAY     |
| B11      | CDK4   | 0.7214                             | OKAY     | 0.88        | OKAY     | 0.7827      | OKAY     |
| B12      | CDKN1A | 97.6064                            | OKAY     | 1.0909      | OKAY     | 45.7758     | OKAY     |
| C01      | CDKN2A | 0.6968                             | OKAY     | 1.2021      | OKAY     | 0.9308      | OKAY     |
| C02      | CHEK1  | 0.543                              | OKAY     | 1.4395      | OKAY     | 0.8745      | OKAY     |
| C03      | CHEK2  | 0.8943                             | OKAY     | 1.0321      | OKAY     | 0.7666      | OKAY     |
| C04      | CRADD  | 1.0345                             | B        | 0.85        | B        | 0.5612      | B        |
| C05      | DNMT1  | 0.5621                             | OKAY     | 0.9174      | OKAY     | 0.6767      | OKAY     |
| C06      | E2F1   | 0.5582                             | OKAY     | 1.1531      | OKAY     | 0.7354      | OKAY     |
| C07      | E2F3   | 0.9195                             | OKAY     | 0.4309      | OKAY     | 0.4253      | OKAY     |
| C08      | EGFR   | 1.1966                             | OKAY     | 1.8603      | OKAY     | 2.1532      | OKAY     |
| C09      | EGR1   | 0.9652                             | OKAY     | 0.7001      | OKAY     | 0.7666      | OKAY     |
| C10      | EI24   | 1.9847                             | OKAY     | 1.2274      | OKAY     | 2.0944      | OKAY     |
| C11      | ESR1   | 1.7519                             | B        | 1.0538      | B        | 1.0328      | B        |

|     |               |           |      |        |      |              |      |
|-----|---------------|-----------|------|--------|------|--------------|------|
| C12 | FADD          | 0.882     | OKAY | 0.9047 | OKAY | 0.6582       | OKAY |
| D01 | FAS           | 3.7293    | OKAY | 1.2021 | OKAY | 2.5964       | OKAY |
| D02 | FASLG         | 0.9992    | C    | 1.3064 | C    | 1.6206       | C    |
| D03 | FOXO3         | 0.8943    | OKAY | 1.3713 | OKAY | 1.17         | OKAY |
| D04 | GADD45A       | 2.4604    | OKAY | 1.0685 | OKAY | 1.4404       | OKAY |
| D05 | GML           | 0.9992    | C    | 1.3064 | C    | 1.6206       | C    |
| D06 | HDAC1         | 1.2217    | OKAY | 1.0611 | OKAY | 1.1539       | OKAY |
| D07 | HK2           | 0.806     | OKAY | 0.4749 | OKAY | 0.3833       | OKAY |
| D08 | IGF1R         | 2.8068    | OKAY | 1.8095 | OKAY | 3.1745       | OKAY |
| D09 | IL6           | 0.9992    | C    | 1.3064 | C    | 1.6206       | C    |
| D10 | JUN           | 0.7469    | OKAY | 0.538  | OKAY | 0.3754       | OKAY |
| D11 | KAT2B         | 1.8776    | OKAY | 1.0538 | OKAY | 1.8875       | OKAY |
| D12 | KRAS          | 0.7949    | OKAY | 0.7714 | OKAY | 0.5973       | OKAY |
| E01 | MCL1          | 1.1164    | OKAY | 0.8441 | OKAY | 0.8745       | OKAY |
| E02 | MDM2          | 23.0853   | OKAY | 1.2359 | OKAY | 19.2464      | OKAY |
| E03 | MDM4          | 1.1087    | OKAY | 1.5216 | OKAY | 1.1619       | OKAY |
| E04 | MLH1          | 1.2388    | OKAY | 0.8985 | OKAY | 0.8331       | OKAY |
| E05 | MSH2          | 0.6502    | OKAY | 0.7608 | OKAY | 0.4495       | OKAY |
| E06 | MYC           | 0.7573    | OKAY | 0.8861 | OKAY | 0.7252       | OKAY |
| E07 | MYOD1         | 0.9992    | C    | 1.3064 | C    | 1.6206       | C    |
| E08 | NF1           | 1.0273    | OKAY | 1.6883 | OKAY | 1.4404       | OKAY |
| E09 | NFKB1         | 1.3841    | OKAY | 0.8619 | OKAY | 0.9053       | OKAY |
| E10 | PCNA          | 1.2914    | OKAY | 0.6137 | OKAY | 0.9503       | OKAY |
| E11 | PIDD          | 10.7697   | OKAY | 0.6353 | A    | 1.9139       | OKAY |
| E12 | PPM1D         | 2.3116    | OKAY | 1.1139 | OKAY | 1.7982       | OKAY |
| F01 | PRC1          | 0.5505    | OKAY | 1.0685 | OKAY | 0.5891       | OKAY |
| F02 | PRKCA         | 1.1801    | OKAY | 1.5216 | OKAY | 1.8233       | OKAY |
| F03 | PTEN          | 1.4131    | OKAY | 1.4495 | OKAY | 1.5872       | OKAY |
| F04 | PTTG1         | 1.0273    | OKAY | 1.2884 | OKAY | 1.2282       | OKAY |
| F05 | RB1           | 1.6574    | OKAY | 0.8985 | OKAY | 1.0917       | OKAY |
| F06 | RELA          | 0.8579    | OKAY | 1.0393 | OKAY | 1.0115       | OKAY |
| F07 | RPRM          | 8.5085    | A    | 0.0441 | B    | 1.2715       | B    |
| F08 | SESN2         | 5.6919    | OKAY | 1.2619 | OKAY | 3.8278       | OKAY |
| F09 | SIAH1         | 0.7626    | OKAY | 1.1139 | OKAY | 0.9503       | OKAY |
| F10 | SIRT1         | 1.1011    | OKAY | 1.6766 | OKAY | 1.3072       | OKAY |
| F11 | STAT1         | 1.2474    | OKAY | 1.1692 | OKAY | 1.1459       | OKAY |
| F12 | TADA3         | 1.0345    | OKAY | 1.1856 | OKAY | 1.2029       | OKAY |
| G01 | TNF           | 0.9992    | C    | 1.3064 | C    | 1.6206       | C    |
| G02 | TNFRSF1<br>0B | 3.5038    | OKAY | 0.7248 | OKAY | 1.6777       | OKAY |
| G03 | TNFRSF1<br>0D | 4.1093    | OKAY | 1.0909 | OKAY | 3.1745       | OKAY |
| G04 | TP53          | 73166.951 | A    | 1.3064 | C    | 276422.<br>2 | A    |
| G05 | TP53AIP1      | 0.9992    | C    | 1.3064 | C    | 1.6206       | C    |
| G06 | TP53BP2       | 1.2388    | OKAY | 1.0465 | OKAY | 0.8745       | OKAY |
| G07 | TP63          | 0.852     | B    | 1.1139 | B    | 1.3818       | B    |
| G08 | TP73          | 0.59      | B    | 0.3312 | B    | 0.2141       | B    |

|     |       |        |      |        |      |        |      |
|-----|-------|--------|------|--------|------|--------|------|
| G09 | TRAF2 | 0.6024 | OKAY | 1.0109 | OKAY | 0.6446 | OKAY |
| G10 | TSC1  | 1.0062 | OKAY | 1.4296 | OKAY | 1.1301 | OKAY |
| G11 | WT1   | 0.6638 | OKAY | 0.6137 | OKAY | 0.5093 | OKAY |
| G12 | XRCC5 | 0.9006 | OKAY | 1.0611 | OKAY | 0.8273 | OKAY |
| H01 | ACTB  | 0.9519 | OKAY | 0.963  | OKAY | 0.9771 | OKAY |
| H02 | B2M   | 1.1087 | OKAY | 1.6195 | OKAY | 1.6894 | OKAY |
| H03 | GAPDH | 1.0859 | OKAY | 0.7148 | OKAY | 0.6861 | OKAY |
| H04 | HPRT1 | 0.882  | OKAY | 1.2884 | OKAY | 1.2453 | OKAY |
| H05 | RPLP0 | 0.9787 | OKAY | 0.8098 | OKAY | 0.8273 | OKAY |
| H06 | HGDC  | 0.9992 | C    | 1.3064 | C    | 1.6206 | C    |
| H07 | RTC   | 1.3094 | OKAY | 1.2619 | OKAY | 1.3163 | OKAY |
| H08 | RTC   | 1.2474 | OKAY | 1.2189 | OKAY | 1.2627 | OKAY |
| H09 | RTC   | 1.3004 | OKAY | 1.2274 | OKAY | 1.1946 | OKAY |
| H10 | PPC   | 0.9787 | OKAY | 1.3524 | OKAY | 1.0692 | OKAY |
| H11 | PPC   | 0.9855 | OKAY | 1.3619 | OKAY | 1.1223 | OKAY |
| H12 | PPC   | 0.9519 | OKAY | 1.3431 | OKAY | 1.4505 | OKAY |

Supplementary Table 1. PCR array to examine the expression of most known p53 downstream targets in the parental and PBRM1 knockout (KO) H1299 cells after transfection of p53. Source data are provided as a Source Data file.
